# Supplementary material for: Development and evaluation of the interactive Model for Air Pollution and Land Ecosystems (iMAPLE) version 1.0
Source: Copernicus journal article supplement (doi:10.5194/gmd-2023-144), 2023-10-19
Supplement: Supplementary file 1 [file gmd-2023-144-supplement.pdf]

## **Supporting Information**

### **Development and evaluation of the interactive Model for Air Pollution and Land Ecosystems (iMAPLE) version 1.0**

Xu Yue, Hao Zhou, Chenguang Tian, Yimian Ma, Yihan Hu, Cheng Gong, Hui Zheng, Hong Liao

Table S1-S2

**Table S1** Summary of 201 FLUXNET sites used for model validations

| Site   | PFT <sup>a</sup> | Start | End  | Longitude | Latitude | Country   |
|--------|------------------|-------|------|-----------|----------|-----------|
| AR-SLu | DBF              | 2009  | 2011 | 66.46°W   | 33.465°S | Argentina |
| AR-Vir | ENF              | 2009  | 2012 | 56.189°W  | 28.24°S  | Argentina |
| AT-Neu | Grass            | 2002  | 2012 | 11.318°E  | 47.117°N | Austria   |
| AU-Ade | Shrub            | 2007  | 2009 | 131.118°E | 13.077°S | Australia |
| AU-ASM | ENF              | 2010  | 2014 | 133.249°E | 22.283°S | Australia |
| AU-Cpr | Shrub            | 2010  | 2014 | 140.589°E | 34.002°S | Australia |
| AU-Cum | EBF              | 2012  | 2014 | 150.723°E | 33.613°S | Australia |
| AU-DaP | Grass            | 2007  | 2013 | 131.318°E | 14.063°S | Australia |
| AU-DaS | Shrub            | 2008  | 2014 | 131.388°E | 14.159°S | Australia |
| AU-Dry | Shrub            | 2008  | 2014 | 132.371°E | 15.259°S | Australia |
| AU-Emr | Grass            | 2011  | 2013 | 148.475°E | 23.859°S | Australia |
| AU-Fog | Shrub            | 2006  | 2008 | 131.307°E | 12.545°S | Australia |
| AU-Gin | Shrub            | 2011  | 2014 | 115.714°E | 31.376°S | Australia |
| AU-GWW | Shrub            | 2013  | 2014 | 120.654°E | 30.191°S | Australia |
| AU-How | Shrub            | 2001  | 2014 | 131.152°E | 12.494°S | Australia |
| AU-Lox | DBF              | 2008  | 2009 | 140.655°E | 34.47°S  | Australia |
| AU-RDF | Shrub            | 2011  | 2013 | 132.478°E | 14.564°S | Australia |
| AU-Rig | Grass            | 2011  | 2014 | 145.576°E | 36.65°S  | Australia |
| AU-Rob | EBF              | 2014  | 2014 | 145.63°E  | 17.118°S | Australia |
| AU-Stp | Grass            | 2008  | 2014 | 133.35°E  | 17.151°S | Australia |
| AU-TTE | Shrub            | 2012  | 2014 | 133.64°E  | 22.287°S | Australia |
| AU-Wac | EBF              | 2005  | 2008 | 145.188°E | 37.426°S | Australia |
| AU-Whr | EBF              | 2011  | 2014 | 145.029°E | 36.673°S | Australia |
| AU-Wom | EBF              | 2010  | 2014 | 144.094°E | 37.422°S | Australia |
| AU-Ync | Grass            | 2012  | 2014 | 146.291°E | 34.989°S | Australia |
| BE-Bra | ENF              | 1996  | 2014 | 4.521°E   | 51.309°N | Belgium   |
| BE-Lon | Crop             | 2004  | 2014 | 4.746°E   | 50.552°N | Belgium   |
| BE-Vie | ENF              | 1996  | 2014 | 5.998°E   | 50.305°N | Belgium   |
| BR-Sa3 | EBF              | 2000  | 2004 | 54.971°W  | 3.018°S  | Brazil    |
| CA-Gro | ENF              | 2003  | 2014 | 82.156°W  | 48.217°N | Canada    |
| CA-Man | ENF              | 1994  | 2008 | 98.481°W  | 55.88°N  | Canada    |
| CA-NS1 | ENF              | 2001  | 2005 | 98.484°W  | 55.879°N | Canada    |
| CA-NS2 | ENF              | 2001  | 2005 | 98.525°W  | 55.906°N | Canada    |
| CA-NS3 | ENF              | 2001  | 2005 | 98.382°W  | 55.912°N | Canada    |
| CA-NS4 | ENF              | 2002  | 2005 | 98.381°W  | 55.914°N | Canada    |
| CA-NS5 | ENF              | 2001  | 2005 | 98.485°W  | 55.863°N | Canada    |
| CA-NS6 | Shrub            | 2001  | 2005 | 98.964°W  | 55.917°N | Canada    |

|        |       |      |      |           |          |                |
|--------|-------|------|------|-----------|----------|----------------|
| CA-NS7 | Shrub | 2002 | 2005 | 99.948°W  | 56.636°N | Canada         |
| CA-Oas | DBF   | 1996 | 2010 | 106.198°W | 53.629°N | Canada         |
| CA-Obs | ENF   | 1997 | 2010 | 105.118°W | 53.987°N | Canada         |
| CA-Qfo | ENF   | 2003 | 2010 | 74.342°W  | 49.693°N | Canada         |
| CA-SF1 | ENF   | 2003 | 2006 | 105.818°W | 54.485°N | Canada         |
| CA-SF2 | ENF   | 2001 | 2005 | 105.878°W | 54.254°N | Canada         |
| CA-SF3 | Shrub | 2001 | 2006 | 106.005°W | 54.092°N | Canada         |
| CA-TP1 | ENF   | 2002 | 2014 | 80.56°W   | 42.661°N | Canada         |
| CA-TP2 | ENF   | 2002 | 2007 | 80.459°W  | 42.774°N | Canada         |
| CA-TP3 | ENF   | 2002 | 2014 | 80.348°W  | 42.707°N | Canada         |
| CA-TP4 | ENF   | 2002 | 2014 | 80.357°W  | 42.71°N  | Canada         |
| CA-TPD | DBF   | 2012 | 2014 | 80.558°W  | 42.635°N | Canada         |
| CG-Tch | Shrub | 2006 | 2009 | 11.656°E  | 4.289°S  | Congo          |
| CH-Cha | Grass | 2005 | 2014 | 8.41°E    | 47.21°N  | Switzerland    |
| CH-Dav | ENF   | 1997 | 2014 | 9.856°E   | 46.815°N | Switzerland    |
| CH-Fru | Grass | 2005 | 2014 | 8.538°E   | 47.116°N | Switzerland    |
| CH-Lae | ENF   | 2004 | 2014 | 8.365°E   | 47.478°N | Switzerland    |
| CH-Oe1 | Grass | 2002 | 2008 | 7.732°E   | 47.286°N | Switzerland    |
| CH-Oe2 | Crop  | 2004 | 2014 | 7.734°E   | 47.286°N | Switzerland    |
| CN-Cha | ENF   | 2003 | 2005 | 128.096°E | 42.403°N | China          |
| CN-Cng | Grass | 2007 | 2010 | 123.509°E | 44.593°N | China          |
| CN-Dan | Grass | 2004 | 2005 | 91.066°E  | 30.498°N | China          |
| CN-Din | EBF   | 2003 | 2005 | 112.536°E | 23.173°N | China          |
| CN-Du2 | Grass | 2006 | 2008 | 116.284°E | 42.047°N | China          |
| CN-Du3 | Grass | 2009 | 2010 | 116.281°E | 42.055°N | China          |
| CN-Ha2 | Shrub | 2003 | 2005 | 101.327°E | 37.609°N | China          |
| CN-HaM | Grass | 2002 | 2004 | 101.18°E  | 37.37°N  | China          |
| CN-Qia | ENF   | 2003 | 2005 | 115.058°E | 26.741°N | China          |
| CN-Sw2 | Grass | 2010 | 2012 | 111.897°E | 41.79°N  | China          |
| CZ-BK1 | ENF   | 2004 | 2014 | 18.537°E  | 49.502°N | Czech Republic |
| CZ-BK2 | Grass | 2004 | 2012 | 18.543°E  | 49.494°N | Czech Republic |
| CZ-wet | Shrub | 2006 | 2014 | 14.77°E   | 49.025°N | Czech Republic |
| DE-Akm | Shrub | 2009 | 2014 | 13.683°E  | 53.866°N | Poland         |
| DE-Geb | Crop  | 2001 | 2014 | 10.914°E  | 51.1°N   | Germany        |
| DE-Gri | Grass | 2004 | 2014 | 13.513°E  | 50.95°N  | Germany        |
| DE-Hai | DBF   | 2000 | 2012 | 10.453°E  | 51.079°N | Germany        |
| DE-Kli | Crop  | 2004 | 2014 | 13.522°E  | 50.893°N | Germany        |
| DE-Lkb | ENF   | 2009 | 2013 | 13.305°E  | 49.1°N   | Germany        |
| DE-Lnf | DBF   | 2002 | 2012 | 10.368°E  | 51.328°N | Germany        |
| DE-Obe | ENF   | 2008 | 2014 | 13.721°E  | 50.787°N | Germany        |

|        |       |      |      |          |          |               |
|--------|-------|------|------|----------|----------|---------------|
| DE-RuR | Grass | 2011 | 2014 | 6.304°E  | 50.622°N | Germany       |
| DE-RuS | Crop  | 2011 | 2014 | 6.447°E  | 50.866°N | Germany       |
| DE-Seh | Crop  | 2007 | 2010 | 6.45°E   | 50.871°N | Germany       |
| DE-SfN | Shrub | 2012 | 2014 | 11.328°E | 47.806°N | Germany       |
| DE-Spw | Shrub | 2010 | 2014 | 14.034°E | 51.892°N | Germany       |
| DE-Tha | ENF   | 1996 | 2014 | 13.565°E | 50.962°N | Germany       |
| DE-Zrk | Shrub | 2013 | 2014 | 12.889°E | 53.876°N | Germany       |
| DK-Eng | Grass | 2005 | 2008 | 12.192°E | 55.69°N  | Denmark       |
| DK-Fou | Crop  | 2005 | 2005 | 9.587°E  | 56.484°N | Denmark       |
| DK-NuF | Shrub | 2008 | 2014 | 51.386°W | 64.131°N | Godthab       |
| DK-Sor | DBF   | 1996 | 2014 | 11.645°E | 55.486°N | Denmark       |
| DK-ZaF | Shrub | 2008 | 2011 | 20.555°W | 74.481°N | Greenland     |
| DK-ZaH | Grass | 2000 | 2014 | 20.55°W  | 74.473°N | Greenland     |
| ES-Amo | Shrub | 2007 | 2012 | 2.252°W  | 36.834°N | Spain         |
| ES-LgS | Shrub | 2007 | 2009 | 2.966°W  | 37.098°N | Spain         |
| ES-LJu | Shrub | 2004 | 2013 | 2.752°W  | 36.927°N | Spain         |
| ES-Ln2 | Shrub | 2009 | 2009 | 3.476°W  | 36.97°N  | Spain         |
| FI-Hyy | ENF   | 1996 | 2014 | 24.295°E | 61.847°N | Finland       |
| FI-Jok | Crop  | 2000 | 2003 | 23.514°E | 60.899°N | Finland       |
| FI-Let | ENF   | 2009 | 2012 | 23.96°E  | 60.642°N | Finland       |
| FI-Lom | Shrub | 2007 | 2009 | 24.209°E | 67.997°N | Finland       |
| FI-Sod | ENF   | 2001 | 2014 | 26.638°E | 67.362°N | Finland       |
| FR-Fon | DBF   | 2005 | 2014 | 2.78°E   | 48.476°N | France        |
| FR-Gri | Crop  | 2004 | 2014 | 1.952°E  | 48.844°N | France        |
| FR-LBr | ENF   | 1996 | 2008 | 0.769°W  | 44.717°N | France        |
| FR-Pue | EBF   | 2000 | 2014 | 3.596°E  | 43.741°N | France        |
| GF-Guy | EBF   | 2004 | 2014 | 52.925°W | 5.279°N  | French Guiana |
| GH-Ank | EBF   | 2011 | 2014 | 2.694°W  | 5.268°N  | Ghana         |
| IT-BCi | Crop  | 2004 | 2014 | 14.957°E | 40.524°N | Italy         |
| IT-CA1 | DBF   | 2011 | 2014 | 12.027°E | 42.38°N  | Italy         |
| IT-CA2 | Crop  | 2011 | 2014 | 12.026°E | 42.377°N | Italy         |
| IT-CA3 | DBF   | 2011 | 2014 | 12.022°E | 42.38°N  | Italy         |
| IT-Col | DBF   | 1996 | 2014 | 13.588°E | 41.849°N | Italy         |
| IT-Cp2 | EBF   | 2012 | 2014 | 12.357°E | 41.704°N | Italy         |
| IT-Cpz | EBF   | 1997 | 2009 | 12.376°E | 41.705°N | Italy         |
| IT-Isp | DBF   | 2013 | 2014 | 8.634°E  | 45.813°N | Italy         |
| IT-La2 | ENF   | 2000 | 2002 | 11.285°E | 45.954°N | Italy         |
| IT-Lav | ENF   | 2003 | 2014 | 11.281°E | 45.956°N | Italy         |
| IT-MBo | Grass | 2003 | 2013 | 11.046°E | 46.015°N | Italy         |
| IT-Noe | Shrub | 2004 | 2014 | 8.151°E  | 40.606°N | Italy         |

|        |       |      |      |           |          |             |
|--------|-------|------|------|-----------|----------|-------------|
| IT-PT1 | DBF   | 2002 | 2004 | 9.061°E   | 45.201°N | Italy       |
| IT-Ren | ENF   | 1998 | 2013 | 11.434°E  | 46.587°N | Italy       |
| IT-Ro1 | DBF   | 2000 | 2008 | 11.93°E   | 42.408°N | Italy       |
| IT-Ro2 | DBF   | 2002 | 2012 | 11.921°E  | 42.39°N  | Italy       |
| IT-SR2 | ENF   | 2013 | 2014 | 10.291°E  | 43.732°N | Italy       |
| IT-SRo | ENF   | 1999 | 2012 | 10.284°E  | 43.728°N | Italy       |
| IT-Tor | Grass | 2008 | 2014 | 7.578°E   | 45.844°N | Italy       |
| JP-MBF | DBF   | 2003 | 2005 | 142.319°E | 44.387°N | Japan       |
| JP-SMF | DBF   | 2002 | 2006 | 137.079°E | 35.262°N | Japan       |
| MY-PSO | EBF   | 2003 | 2009 | 102.306°E | 2.973°N  | Malaysia    |
| NL-Hor | Grass | 2004 | 2011 | 5.071°E   | 52.24°N  | Netherlands |
| NL-Loo | ENF   | 1996 | 2014 | 5.744°E   | 52.167°N | Netherlands |
| NO-Adv | Shrub | 2011 | 2014 | 15.923°E  | 78.186°N | Norway      |
| PA-SPn | DBF   | 2007 | 2009 | 79.635°W  | 9.318°N  | Panama      |
| PA-SPs | Grass | 2007 | 2009 | 79.631°W  | 9.314°N  | Panama      |
| RU-Che | Shrub | 2002 | 2005 | 161.341°E | 68.613°N | Russia      |
| RU-Cok | Shrub | 2003 | 2014 | 147.494°E | 70.829°N | Russia      |
| RU-Fyo | ENF   | 1998 | 2014 | 32.922°E  | 56.461°N | Russia      |
| RU-Ha1 | Grass | 2002 | 2004 | 90.002°E  | 54.725°N | Russia      |
| RU-Sam | Grass | 2002 | 2014 | 126.496°E | 72.374°N | Russia      |
| RU-SkP | ENF   | 2012 | 2014 | 129.168°E | 62.255°N | Russia      |
| RU-Tks | Grass | 2010 | 2014 | 128.888°E | 71.594°N | Russia      |
| RU-Vrk | Shrub | 2008 | 2008 | 62.94°E   | 67.055°N | Russia      |
| SD-Dem | Shrub | 2005 | 2009 | 30.478°E  | 13.283°N | Russia      |
| SE-St1 | Shrub | 2012 | 2014 | 19.05°E   | 68.354°N | Sweden      |
| SN-Dhr | Shrub | 2010 | 2013 | 15.432°W  | 15.403°N | Senegal     |
| US-AR1 | Grass | 2009 | 2012 | 99.42°W   | 36.427°N | USA         |
| US-AR2 | Grass | 2009 | 2012 | 99.598°W  | 36.636°N | USA         |
| US-ARb | Grass | 2005 | 2006 | 98.04°W   | 35.55°N  | USA         |
| US-ARc | Grass | 2005 | 2006 | 98.04°W   | 35.547°N | USA         |
| US-ARM | Crop  | 2003 | 2012 | 97.489°W  | 36.606°N | USA         |
| US-Atq | Shrub | 2003 | 2008 | 157.409°W | 70.47°N  | USA         |
| US-Blo | ENF   | 1997 | 2007 | 120.633°W | 38.895°N | USA         |
| US-CRT | Crop  | 2011 | 2013 | 83.347°W  | 41.629°N | USA         |
| US-GBT | ENF   | 1999 | 2006 | 106.24°W  | 41.366°N | USA         |
| US-GLE | ENF   | 2004 | 2014 | 106.24°W  | 41.367°N | USA         |
| US-Goo | Grass | 2002 | 2006 | 89.873°W  | 34.255°N | USA         |
| US-IB2 | Grass | 2004 | 2011 | 88.241°W  | 41.841°N | USA         |
| US-Ivo | Shrub | 2004 | 2007 | 155.75°W  | 68.487°N | USA         |
| US-KS1 | ENF   | 2002 | 2002 | 80.671°W  | 28.458°N | USA         |

|        |       |      |      |           |          |     |
|--------|-------|------|------|-----------|----------|-----|
| US-KS2 | Shrub | 2003 | 2006 | 80.672°W  | 28.609°N | USA |
| US-Lin | Crop  | 2009 | 2010 | 119.842°W | 36.357°N | USA |
| US-Los | Shrub | 2000 | 2014 | 89.979°W  | 46.083°N | USA |
| US-LWW | Grass | 1997 | 1998 | 97.979°W  | 34.96°N  | USA |
| US-Me1 | ENF   | 2004 | 2005 | 121.5°W   | 44.579°N | USA |
| US-Me2 | ENF   | 2002 | 2014 | 121.557°W | 44.452°N | USA |
| US-Me3 | ENF   | 2004 | 2009 | 121.608°W | 44.315°N | USA |
| US-Me4 | ENF   | 1996 | 2000 | 121.622°W | 44.499°N | USA |
| US-Me5 | ENF   | 2000 | 2002 | 121.567°W | 44.437°N | USA |
| US-Me6 | ENF   | 2010 | 2014 | 121.608°W | 44.323°N | USA |
| US-Myb | Shrub | 2010 | 2014 | 121.765°W | 38.05°N  | USA |
| US-NR1 | ENF   | 1998 | 2014 | 105.546°W | 40.033°N | USA |
| US-Oho | DBF   | 2004 | 2013 | 83.844°W  | 41.555°N | USA |
| US-ORv | Shrub | 2011 | 2011 | 83.018°W  | 40.02°N  | USA |
| US-Prr | ENF   | 2010 | 2014 | 147.488°W | 65.124°N | USA |
| US-SRC | Shrub | 2008 | 2014 | 110.84°W  | 31.908°N | USA |
| US-SRG | Grass | 2008 | 2014 | 110.828°W | 31.789°N | USA |
| US-SRM | Shrub | 2004 | 2014 | 110.866°W | 31.821°N | USA |
| US-Sta | Shrub | 2005 | 2009 | 106.802°W | 41.397°N | USA |
| US-Syv | ENF   | 2001 | 2014 | 89.348°W  | 46.242°N | USA |
| US-Ton | Shrub | 2001 | 2014 | 120.966°W | 38.432°N | USA |
| US-Tw1 | Shrub | 2012 | 2014 | 121.647°W | 38.107°N | USA |
| US-Tw2 | Crop  | 2012 | 2013 | 121.643°W | 38.105°N | USA |
| US-Tw3 | Crop  | 2013 | 2014 | 121.647°W | 38.116°N | USA |
| US-Tw4 | Shrub | 2013 | 2014 | 121.641°W | 38.103°N | USA |
| US-Twt | Crop  | 2009 | 2014 | 121.653°W | 38.109°N | USA |
| US-UMd | DBF   | 2007 | 2014 | 84.698°W  | 45.562°N | USA |
| US-Var | Grass | 2000 | 2014 | 120.951°W | 38.413°N | USA |
| US-WCr | DBF   | 1999 | 2014 | 90.08°W   | 45.806°N | USA |
| US-Whs | Shrub | 2007 | 2014 | 110.052°W | 31.744°N | USA |
| US-Wi0 | ENF   | 2002 | 2002 | 91.081°W  | 46.619°N | USA |
| US-Wi1 | DBF   | 2003 | 2003 | 91.233°W  | 46.73°N  | USA |
| US-Wi2 | ENF   | 2003 | 2003 | 91.153°W  | 46.687°N | USA |
| US-Wi3 | DBF   | 2002 | 2004 | 91.099°W  | 46.635°N | USA |
| US-Wi4 | ENF   | 2002 | 2005 | 91.166°W  | 46.739°N | USA |
| US-Wi5 | ENF   | 2004 | 2004 | 91.086°W  | 46.653°N | USA |
| US-Wi6 | Shrub | 2002 | 2003 | 91.298°W  | 46.625°N | USA |
| US-Wi7 | Shrub | 2005 | 2005 | 91.069°W  | 46.649°N | USA |
| US-Wi8 | DBF   | 2002 | 2002 | 91.252°W  | 46.722°N | USA |
| US-Wi9 | ENF   | 2004 | 2005 | 91.081°W  | 46.619°N | USA |

|        |       |      |      |           |          |              |
|--------|-------|------|------|-----------|----------|--------------|
| US-Wkg | Grass | 2004 | 2014 | 109.942°W | 31.736°N | USA          |
| US-WPT | Shrub | 2011 | 2013 | 82.996°W  | 41.465°N | USA          |
| ZA-Kru | Shrub | 2000 | 2013 | 31.497°E  | 25.02°S  | South Africa |
| ZM-Mon | DBF   | 2000 | 2009 | 23.253°E  | 15.438°S | Zambia       |

<sup>a</sup> The plant functional types (PFT) include evergreen broadleaf forest (EBF, 13 sites), evergreen needleleaf forest (ENF, 57 sites), deciduous broadleaf forest (DBF, 25 sites), Shrub (52 sites), Grass (37 sites), and Crop (17 sites).

**Table S2.** Summary of 44 FLUXNET-CH<sub>4</sub> sites used for model validations

| Site   | Latitude | Longitude | Period    | Min ~ Max<br>(g[CH <sub>4</sub> ]m <sup>-2</sup> yr <sup>-1</sup> ) |
|--------|----------|-----------|-----------|---------------------------------------------------------------------|
| AT-Neu | 47.117°N | 11.318°E  | 2010-2012 | 0.17 ~ 0.91                                                         |
| BR-Npw | 16.498°S | 56.412°W  | 2013-2016 | 1.30 ~ 88.95                                                        |
| BW-Gum | 18.965°S | 22.371°E  | 2018      | 44.69 ~ 176.00                                                      |
| BW-Nxr | 19.548°S | 23.179°E  | 2018      | 13.73 ~ 130.46                                                      |
| CA-SCB | 61.309°N | 121.298°W | 2014-2017 | 7.51 ~ 39.08                                                        |
| CA-SCC | 61.308°N | 121.299°W | 2013-2016 | 3.24 ~ 24.22                                                        |
| CH-Cha | 47.210°N | 8.410°E   | 2012-2016 | 3.83 ~ 7.37                                                         |
| CH-Dav | 46.815°N | 9.856°E   | 2016-2017 | 0.87 ~ 4.91                                                         |
| DE-Dgw | 53.151°N | 13.054°E  | 2015-2018 | 0.25 ~ 30.34                                                        |
| FI-Si2 | 61.837°N | 24.197°E  | 2012-2016 | 2.13 ~ 38.14                                                        |
| FI-Sii | 61.833°N | 24.193°E  | 2013-2018 | 3.29 ~ 43.98                                                        |
| IT-Cas | 45.07°N  | 8.718°E   | 2009-2010 | 1.84 ~ 134.84                                                       |
| JP-BBY | 43.323°N | 141.811°E | 2015-2018 | 6.18 ~ 51.59                                                        |
| JP-Mse | 36.054°N | 140.027°E | 2012-2012 | 1.10 ~ 94.89                                                        |
| JP-SwL | 36.047°N | 138.108°E | 2016-2016 | 63.04 ~ 268.37                                                      |
| KR-CRK | 38.201°N | 127.251°E | 2015-2018 | 4.76 ~ 138.16                                                       |
| MY-MLM | 1.454°N  | 111.150°E | 2014-2015 | 6.44 ~ 20.07                                                        |
| NZ-Kop | 37.388°S | 175.554°E | 2012-2015 | 14.63 ~ 37.64                                                       |
| PH-RiF | 14.141°N | 121.265°E | 2012-2014 | 0.97 ~ 42.44                                                        |
| RU-Che | 68.613°N | 161.341°E | 2014-2016 | 1.80 ~ 13.94                                                        |
| RU-Fy2 | 56.448°N | 32.902°E  | 2015-2018 | 0.92 ~ 23.38                                                        |
| SE-Deg | 64.182°N | 19.557°E  | 2014-2018 | 1.35 ~ 37.58                                                        |
| UK-LBT | 51.522°N | 0.139°W   | 2011-2014 | 67.08 ~ 99.65                                                       |
| US-Bes | 71.281°N | 156.597°W | 2013-2015 | 0.34 ~ 16.48                                                        |
| US-Bi1 | 38.099°N | 121.499°W | 2016-2018 | 0.20 ~ 16.78                                                        |
| US-Bi2 | 38.109°N | 121.535°W | 2017-2018 | 0.61 ~ 8.22                                                         |



|        |          |           |           |                |
|--------|----------|-----------|-----------|----------------|
| US-CRT | 41.628°N | 83.347°W  | 2011-2012 | 2.06 ~ 8.95    |
| US-DPW | 28.052°N | 81.436°W  | 2013-2017 | 12.49 ~ 165.81 |
| US-Ho1 | 45.204°N | 68.74°W   | 2012-2018 | 0.02 ~ 0.11    |
| US-Ivo | 68.487°N | 155.75°W  | 2013-2016 | 3.34 ~ 17.17   |
| US-MRM | 40.816°N | 74.044°W  | 2012-2013 | 0.32 ~ 1.26    |
| US-Myb | 38.05°N  | 121.765°W | 2010-2018 | 13.43 ~ 129.49 |
| US-NC4 | 35.788°N | 75.904°W  | 2012-2016 | 5.45 ~ 82.42   |
| US-NGC | 64.862°N | 163.7°W   | 2017-2018 | 2.1 ~ 5.15     |
| US-ORv | 40.02°N  | 83.018°W  | 2011-2015 | 5.08 ~ 24.98   |
| US-Snd | 38.037°N | 121.754°W | 2010-2015 | 5.47 ~ 10.58   |
| US-Sne | 38.037°N | 121.755°W | 2016-2018 | 7.22 ~ 75.19   |
| US-Srr | 38.201°N | 122.026°W | 2014-2017 | 1.84 ~ 3.85    |
| US-StJ | 39.088°N | 75.437°W  | 2016-2016 | 3.55~ 27.39    |
| US-Tw1 | 38.107°N | 121.647°W | 2011-2018 | 24.32 ~ 117.87 |
| US-Tw4 | 38.103°N | 121.641°W | 2013-2018 | 21.13 ~ 79.45  |
| US-Twt | 38.109°N | 121.653°W | 2009-2017 | 4.14 ~ 48.34   |
| US-Uaf | 64.866°N | 147.856°W | 2011-2018 | 0.51 ~ 2.02    |
| US-WPT | 41.465°N | 82.996°W  | 2011-2013 | 4.19 ~ 207.07  |

---
